# Supplementary material for: DNA methylation profile dynamics of tissue-dependent and differentially methylated regions during mouse brain development
Source: PubMed Central journal article supplement (PMC3599493; doi:10.1186/1471-2164-14-82), 2013-02-06
Supplement: 1471-2164-14-82-S4.pdf [file 1471-2164-14-82-S4.pdf]

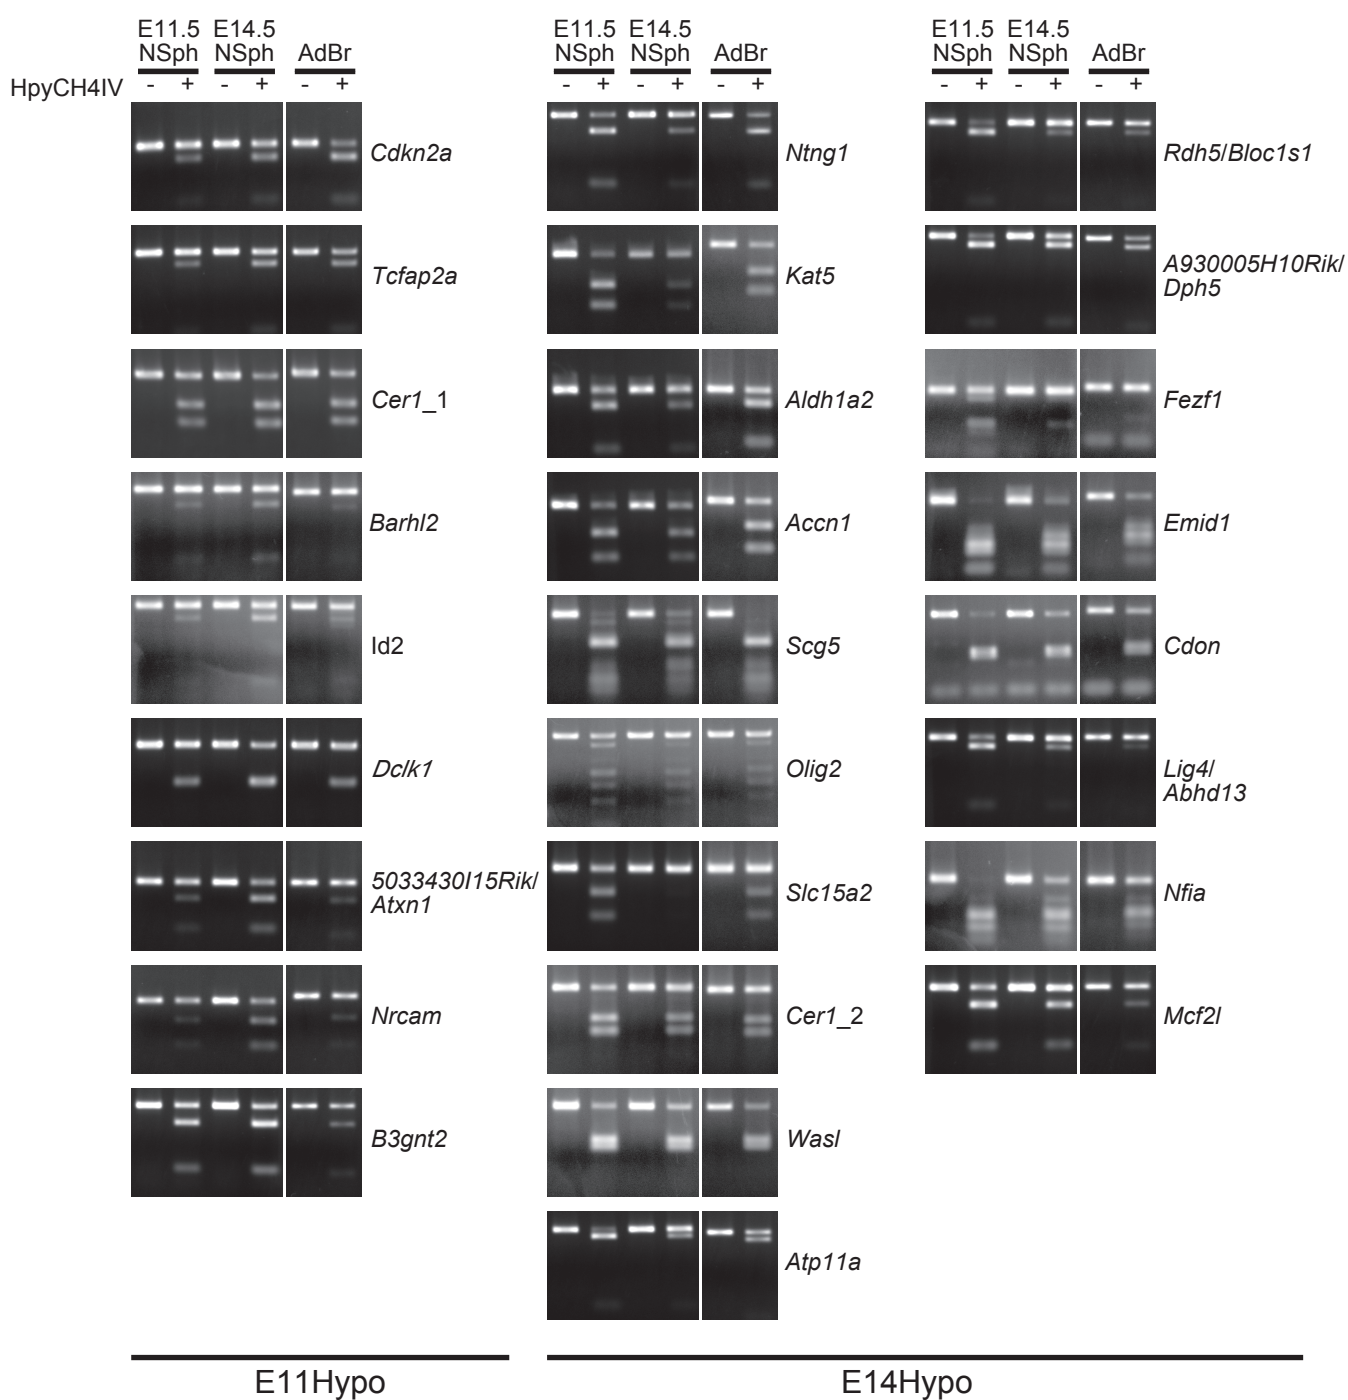

### Figure S3. COBRA for NSph-T-DMRs

Agarose EP gel images for COBRA of NSph-T-DMRs are indicated. Bisulfite PCR products were electrophoresed after incubation without (-) or with the restriction enzyme, HpyCH4IV (+). The target regions are indicated by gray rectangles in Figure S2. Primer sets used are listed in Table S2.
